# Supplementary material for: Advanced Neuroimaging Preceding Intravenous Thrombolysis in Acute Ischemic Stroke Patients Is Safe and Effective
Source: MDPI journal article supplement (doi:10.3390/jcm10132819), 2021-06-26
Supplement: s1 [file s1]

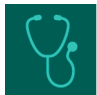

Article

# Supplementary Material: Advanced Neuroimaging Preceding Intravenous Thrombolysis in Acute Ischemic Stroke Patients Is Safe and Effective

Klearchos Psychogios, Apostolos Safouris, Odysseas Kargiotis, Georgios Magoufis, Athina Andrikopoulou, Ermioni Papageorgiou, Maria Chondrogianni, Georgios Papadimitropoulos, Eftihia Polyzogopoulou, Stavros Spiliopoulos, Elias Brountzos, Elefterios Stamboulis, Sotirios Giannopoulos and Georgios Tsivgoulis

**Table S1.** Outcomes in patients treated before and after the implementation of AN, confined in patients treated with IVT during the early time window.

|                                             | AN- ( <i>n</i> = 29) | AN+ ( <i>n</i> = 36) | <i>p</i> -Value |
|---------------------------------------------|----------------------|----------------------|-----------------|
| Any Hemorrhagic Transformation (%)          | 6.9%                 | 8.3%                 | 0.829           |
| Symptomatic Intracranial Hemorrhage (%)     | 3.4%                 | 0.0%                 | 0.262           |
| NIHSS-score 2 hours, points (median, IQR)   | 2 (0.5–3.5)          | 2.5 (1–5)            | 0.346           |
| NIHSS 24 hours, points (median, IQR)        | 1 (0–4)              | 2 (0–3)              | 0.740           |
| Discharge NIHSS (median, IQR)               | 0 (0–2.5)            | 0 (0–2.75)           | 0.869           |
| 3-month Functional Independence (%) *       | 82.1%                | 94.4%                | 0.118           |
| 3-month Favorable Functional Outcome (%) ** | 75.0%                | 80.6%                | 0.594           |
| 3-month Mortality (%)                       | 0%                   | 0%                   | 0.999           |

NIHSS: National Institute of Health Stroke Scale; \* mRS-scores of 0–2; \*\* mRS-scores of 0–1.
